# Supplementary material for: Molecular Landscape of the Epithelial–Mesenchymal Transition in Endometrioid Endometrial Cancer
Source: MDPI journal article supplement (doi:10.3390/jcm10071520), 2021-04-06
Supplement: s1 [file s1]

Supplementary Material

Table S1. Transcripts of genes associated with the EMT process, differentiating the endometrial cancer tissue samples G1-G3 in comparison to a control (p<0.05)

| Groups compared | ID                         | mRNA           | FC    | Expression |
|-----------------|----------------------------|----------------|-------|------------|
| G1 vs C         | 220407_s_at                | <i>TGFβ2</i>   | -4.71 | Decreased  |
|                 | 205990_s_at                | <i>WNT5A</i>   | -3.98 | Decreased  |
|                 | 218902_at                  | <i>NOTCH1</i>  | -7.77 | Decreased  |
|                 | 221633_at                  | <i>NCAPH2</i>  | -2.85 | Decreased  |
|                 | 221636_s_at                | <i>MARC2</i>   | -2.99 | Decreased  |
|                 | 221613_s_at                | <i>ZFAND6</i>  | +3.04 | Increased  |
|                 | 221627_at                  | <i>TRIM10</i>  | +2.74 | Increased  |
|                 | 221640_s_at                | <i>PIDD1</i>   | +1.66 | Increased  |
|                 | 206213_at                  | <i>WNT10B</i>  | -2.01 | Decreased  |
|                 | 206226_at                  | <i>HRG</i>     | -2.01 | Decreased  |
|                 | 206943_at                  | <i>TGFBR1</i>  | -2.11 | Decreased  |
|                 | 207035_at                  | <i>SLC30A3</i> | +1.85 | Increased  |
| G2 vs C         | 207005_s_at                | <i>BCL2L</i>   | +5.04 | Increased  |
|                 | 202935_s_at                | <i>SOX9</i>    | -3.11 | Decreased  |
|                 | 203304_at                  | <i>BAMBI</i>   | +3.66 | Increased  |
|                 | 202527_s_at                | <i>SMAD4</i>   | +3.01 | Increased  |
|                 | 213532_at                  | <i>ADAM17</i>  | +2.66 | Increased  |
|                 | 213563_s_at                | <i>TUBGCP2</i> | -4.58 | Decreased  |
|                 | 213586_at                  | <i>CDKN2D</i>  | -3.66 | Decreased  |
|                 | 206067_s_at                | <i>WT1</i>     | +2.01 | Increased  |
|                 | 207595_s_at                | <i>BMP1</i>    | +1.58 | Increased  |
| G3 vs C         | AFFX-HUMISGF3A/M97935_5_at | <i>STAT1</i>   | +4.01 | Increased  |
|                 | 213917_at                  | <i>PAX8</i>    | -2.05 | Decreased  |
| G1, G2 vs C     | 201983_s_at                | <i>EGFR</i>    | -1.85 | Decreased  |
|                 | 201984_s_at                | <i>EGFR</i>    | -1.45 | Decreased  |
|                 | 202019_s_at                | <i>LANCL1</i>  | +2.00 | Increased  |
|                 | 202020_s_at                | <i>LANCL1</i>  | +2.03 | Increased  |
| G1, G3 vs C     | 203085_s_at                | <i>TGFβ1</i>   | -4.89 | Decreased  |
|                 | 204731_at                  | <i>TGFBR3</i>  | +2.44 | Increased  |
| G2, G3 vs C     | 202310_s_at                | <i>COL1A1</i>  | -2.11 | Decreased  |
|                 | 202311_s_at                | <i>COL1A1</i>  | -1.98 | Decreased  |
|                 | 202312_s_at                | <i>COL1A1</i>  | -2.07 | Decreased  |
| G1,G2,G3 vs C   | 214630_at                  | <i>CYP11B2</i> | +2.55 | Increased  |
|                 | 205174_s_at                | <i>QPCT</i>    | -3.54 | Decreased  |
|                 | 205199_at                  | <i>CA9</i>     | -2.11 | Decreased  |

C, control; G, grade of endometrial cancer; FC- fold change

Table S2. Transcripts of genes associated with the EMT process, differentiating the whole blood samples from patients with endometrial cancer G1-G3 in comparison to a control (p<0.05)

| Groups compared | ID                         | mRNA          | FC    | Expression |
|-----------------|----------------------------|---------------|-------|------------|
| G1 vs C         | 220407_s_at                | <i>TGFβ2</i>  | -4.71 | Decreased  |
|                 | 205990_s_at                | <i>WNT5A</i>  | -3.98 | Decreased  |
|                 | 218902_at                  | <i>NOTCH1</i> | -7.77 | Decreased  |
|                 | 204147_s_at                | <i>TFDP1</i>  | +3.69 | Increased  |
|                 | 204158_s_at                | <i>TCIRG1</i> | -2.69 | Decreased  |
|                 | 204159_at                  | <i>CDKN2C</i> | +4.01 | Increased  |
|                 | 204194_at                  | <i>BACH1</i>  | -2.09 | Decreased  |
|                 | 207309_at                  | <i>NOS1</i>   | -2.54 | Decreased  |
|                 | 207310_s_at                | <i>NOS1</i>   | -2.77 | Decreased  |
|                 | 207328_at                  | <i>ALOX15</i> | +1.98 | Increased  |
|                 | 208211_s_at                | <i>ALK</i>    | -1.57 | Decreased  |
|                 | 208212_s_at                | <i>ALK</i>    | -1.69 | Decreased  |
|                 | 208218_s_at                | <i>ACVR1B</i> | -2.01 | Increased  |
|                 | 207005_s_at                | <i>BCL2L</i>  | +5.04 | Increased  |
|                 | 202935_s_at                | <i>SOX9</i>   | -3.11 | Decreased  |
| G2 vs C         | 203304_at                  | <i>BAMBI</i>  | +3.66 | Increased  |
|                 | 202527_s_at                | <i>SMAD4</i>  | +3.01 | Increased  |
|                 | 208226_x_at                | <i>ADAM22</i> | +2.98 | Increased  |
|                 | 208268_at                  | <i>ADAM28</i> | +3.44 | Increased  |
|                 | 215119_at                  | <i>MYO16</i>  | +2.01 | Increased  |
|                 | 215170_s_at                | <i>CEP152</i> | -1.44 | Decreased  |
|                 | 215209_at                  | <i>SEC24D</i> | -2.65 | Decreased  |
|                 | 215512_at                  | <i>MARCH6</i> | +2.11 | Increased  |
| G3 vs C         | AFFX-HUMISGF3A/M97935_5_at | <i>STAT1</i>  | +4.01 | Increased  |
|                 | 207012_at                  | <i>MMP16</i>  | +2.98 | Increased  |
|                 | 207013_s_at                | <i>MMP16</i>  | +3.04 | Increased  |
| G1, G3 vs C     | 203085_s_at                | <i>TGFβ1</i>  | -4.89 | Decreased  |
|                 | 209591_s_at                | <i>BMP7</i>   | -2.74 | Decreased  |
| G2, G3 vs C     | 210118_s_at                | <i>IL1A</i>   | +3.69 | Increased  |
| G1,G2,G3 vs C   | 203567_s_at                | <i>TRIM38</i> | +2.74 | Increased  |
|                 | 203568_s_at                | <i>TRIM38</i> | +1.66 | Increased  |
|                 | 210735_s_at                | <i>CA12</i>   | -1.44 | Decreased  |

C, control; G, grade of endometrial cancer; FC- fold change
